# Supplementary material
Source: PubMed Central journal article supplement (PMC3033471)
Supplement: NIHMS244877-supplement-01.pdf [file NIHMS244877-supplement-01.pdf]

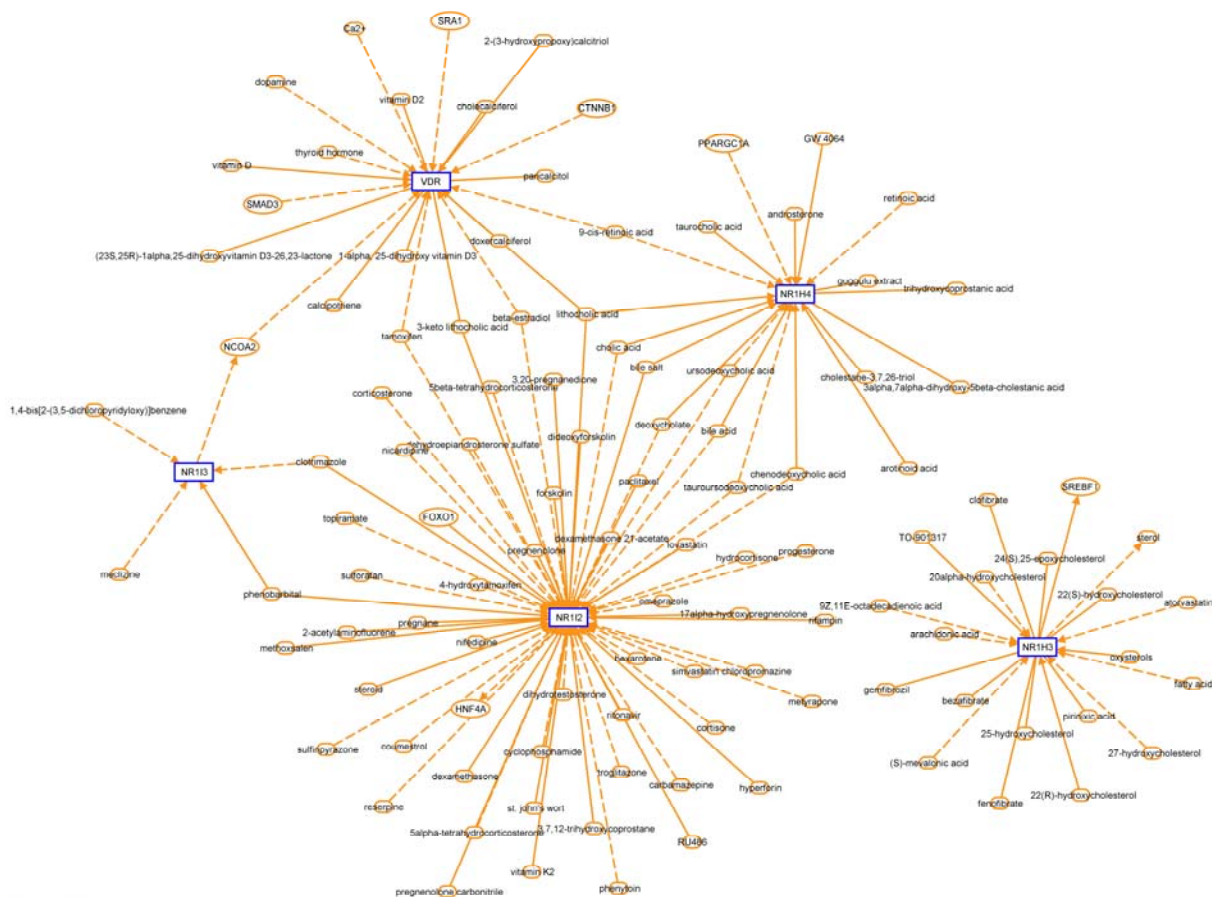

© 2000-2008 Ingenuity Systems, Inc. All rights reserved.

**Supplemental Fig. 1S.** A direct interaction network (Ekins, 2006; Ekins et al., 2005) around the ligands (ovals) and endogenous compounds with the nuclear hormone receptors PXR (NR1I2), CAR (NR1I3), FXR (NR1H4), LXR $\alpha$  (NR1H3), and VDR (NR1I1) (rectangles) in human using IPA 8.0 (Ingenuity Systems, Redwood City, CA, USA).

### References:

- Ekins, S., 2006. Systems-ADME/Tox: resources and network approaches. *J. Pharmacol. Toxicol. Methods* 53, 38-66.
- Ekins, S., Kirillov, E., Rakhmatulin, E.A., Nikotskaya, T., 2005. A novel method for visualizing nuclear hormone receptor networks relevant to drug metabolism. *Drug Metab. Dispos.* 33, 474-481.
